# Supplementary material for: Comprehensive analysis and experimental validation reveal elevated CLCN4 is a promising biomarker in endometrial cancer
Source: Aging (Albany NY). 2023 Sep 5;15(17):8744–69. doi: 10.18632/aging.204994 (PMC10522378; doi:10.18632/aging.204994)
Supplement: Supplementary Figures [file aging-15-204994-s001.pdf]

SUPPLEMENTARY FIGURES

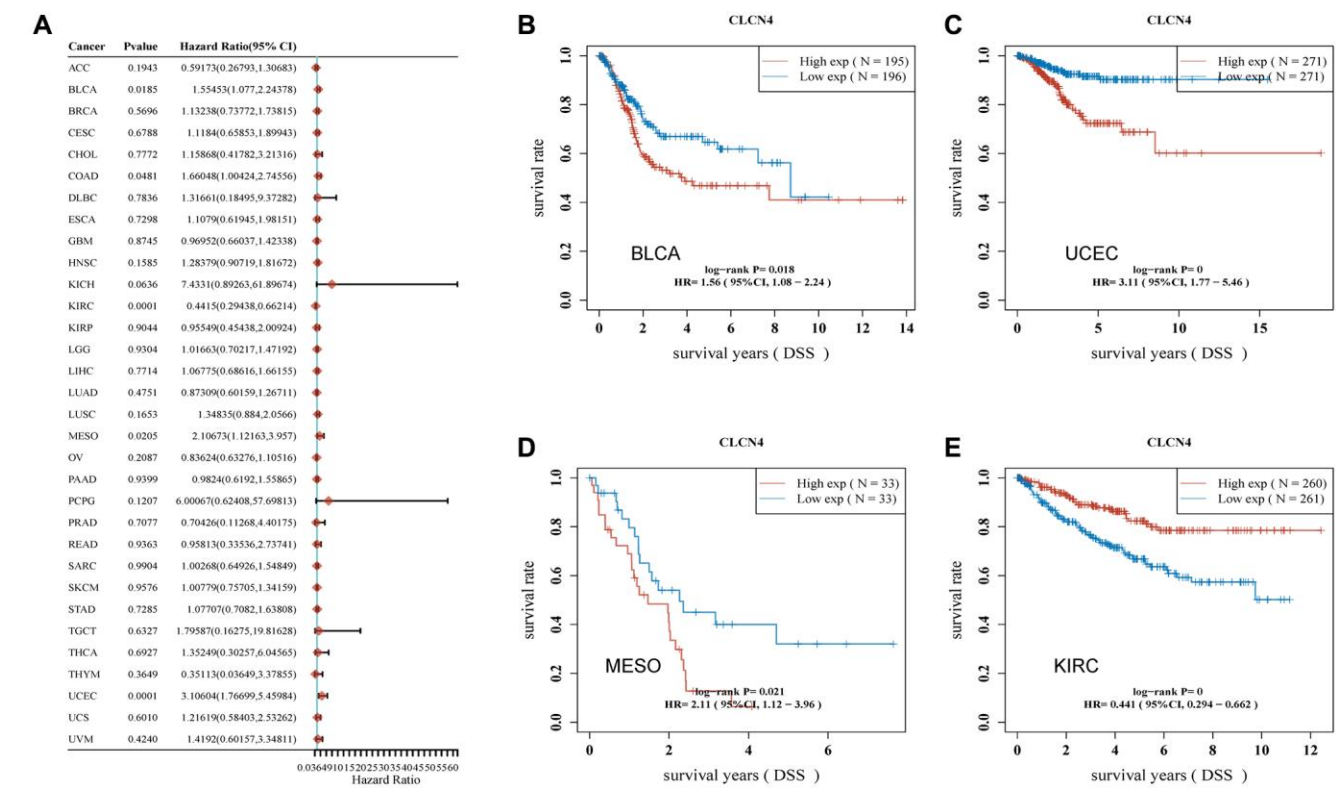

**Supplementary Figure 1. Association of CLCN4 with DSS in pan-cancer.** (A) The correlation between CLCN4 expression and DSS in various tumors used cox regression model. (B–E) DSS Kaplan-Meier curve: (B) BLCA, (C) UCEC, (D) MESO, (E) KIRC.

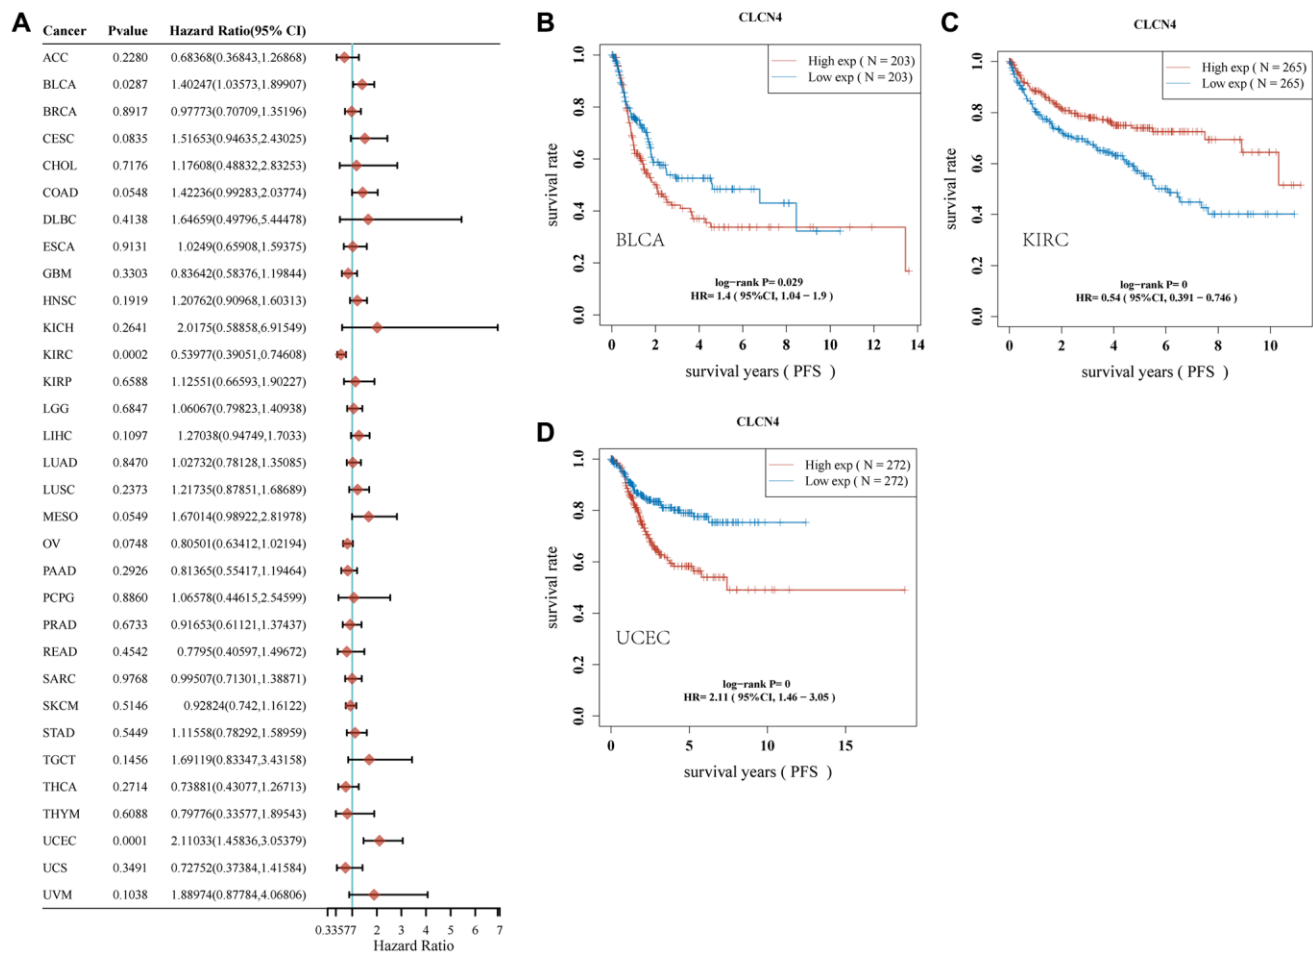

**Supplementary Figure 2. Association of CLCN4 with PFS in pan-cancer.** (A) The correlation between CLCN4 expression and PFS in various tumors used cox regression model. (B–D) PFS Kaplan-Meier curve.

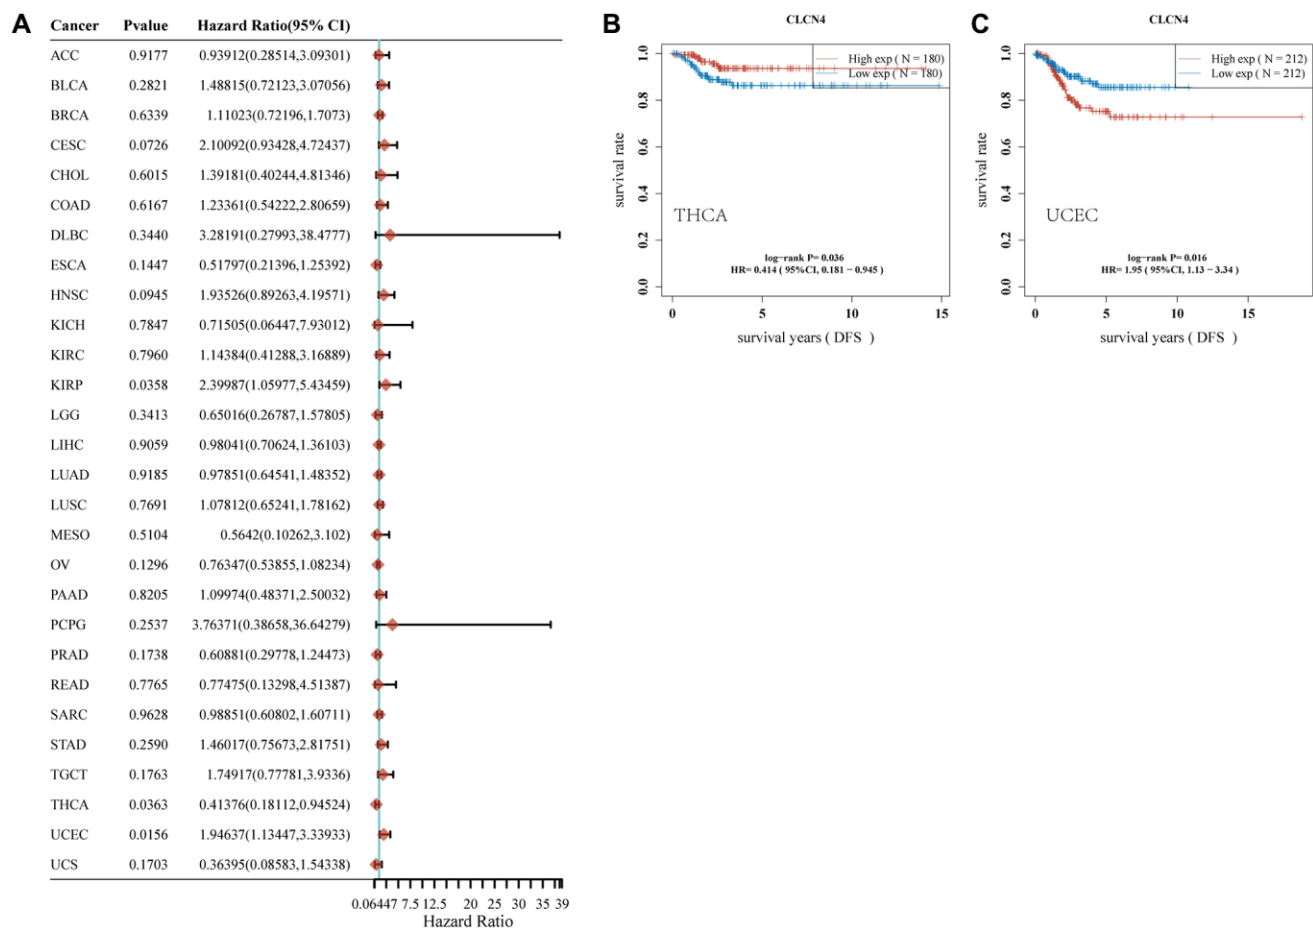

**Supplementary Figure 3. Association of CLCN4 with DFS in pan-cancer.** (A) The correlation between CLCN4 expression and DFS in various tumors used cox regression model. (B, C) DFS Kaplan-Meier curve.

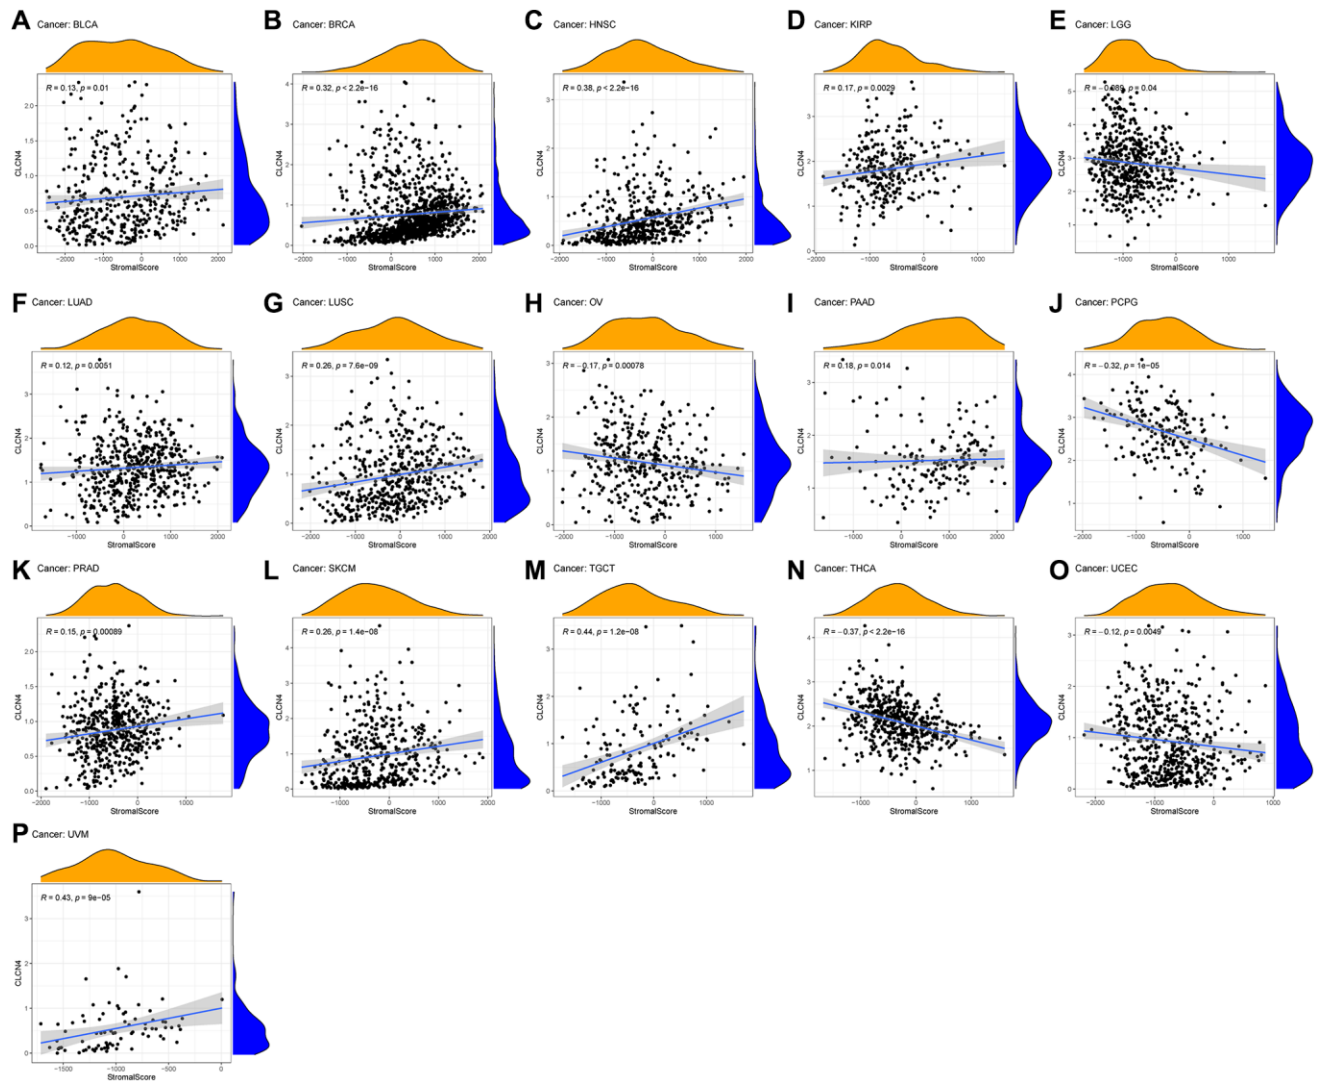

**Supplementary Figure 4. Relationship between CLCN4 expression and Stromal-Score. (A) BLCA. (B) BRCA. (C) HNSC. (D) KIRP. (E) LGG. (F) LUAD. (G) LUSC. (H) OV. (I) PAAD. (J) PCPG. (K) PRAD. (L) SKCM. (M) TGCT. (N) THCA. (O) UCEC. (P) UVM.**

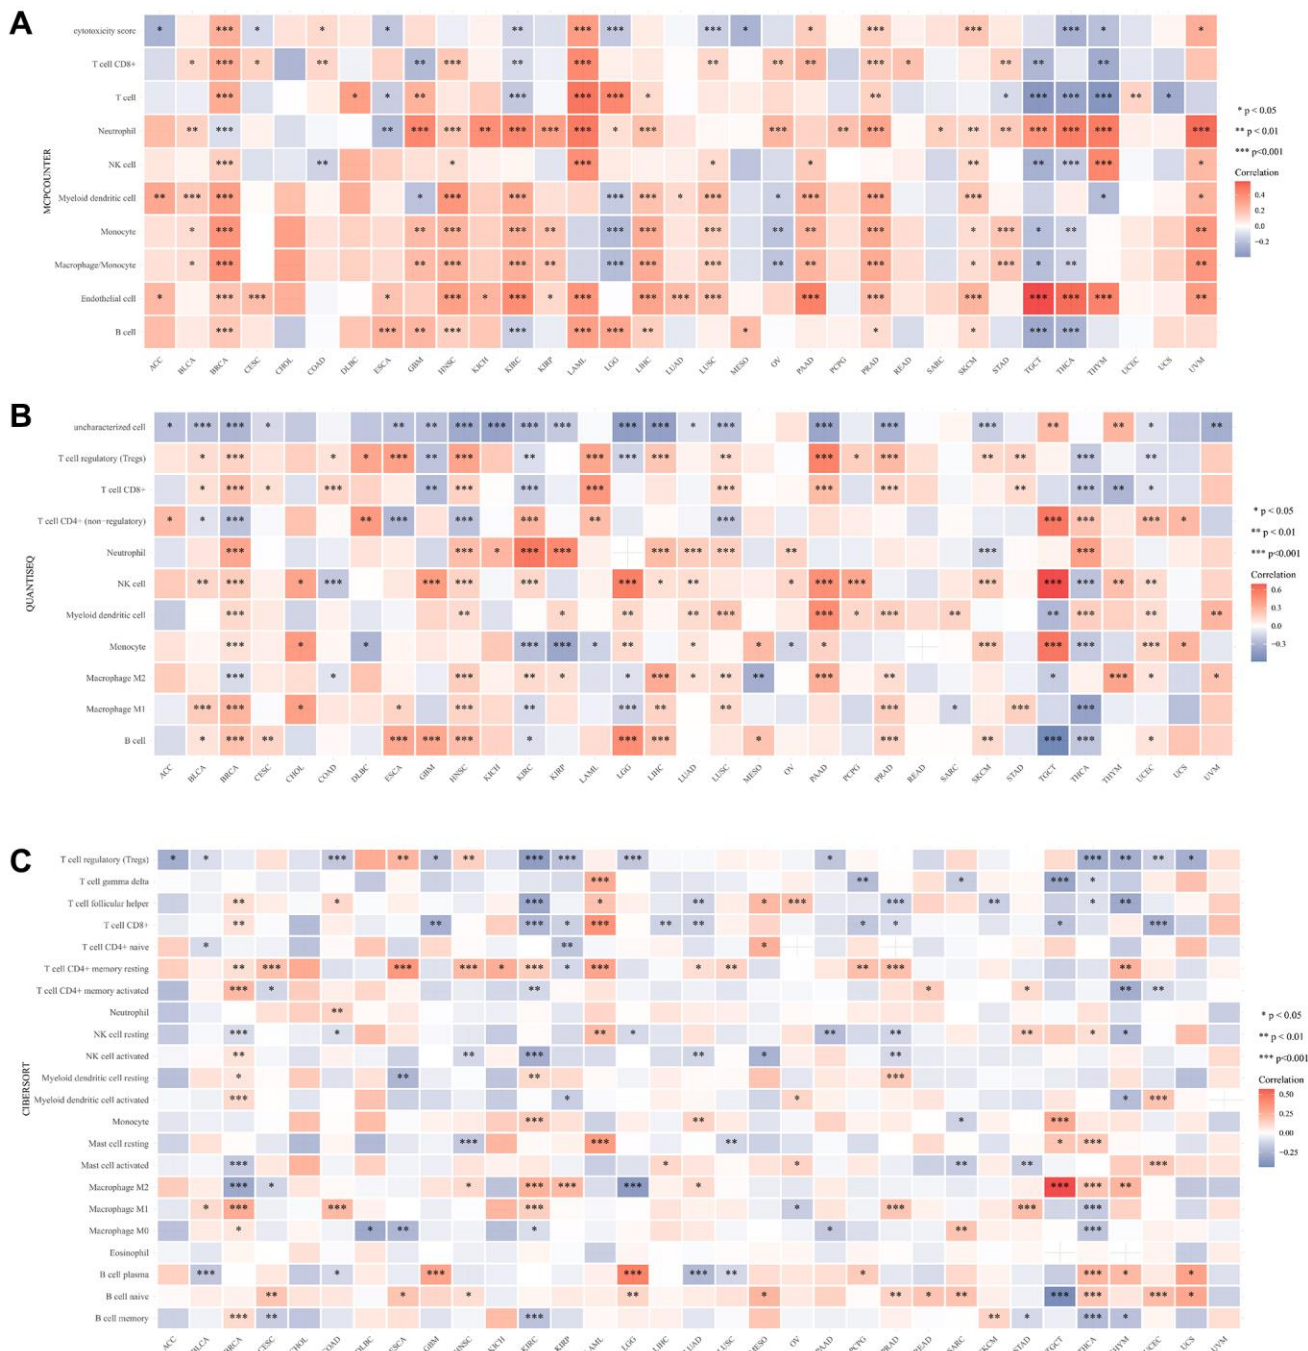

**Supplementary Figure 5. The association between CLCN4 gene expression and 22 immune cells infiltration levels. (A)** The correlation between CLCN4 expression and immune cell infiltration was calculated according to MCPOUNTER algorithm. **(B)** The correlation between CLCN4 expression and immune cell infiltration was calculated according to the QUANTISEQ algorithm. **(C)** The correlation between CLCN4 expression and immune cell infiltration was calculated according to CIBERSORT algorithm. \* $p < 0.05$ , \*\* $p < 0.01$ , \*\*\* $p < 0.001$ .
